# Supplementary material for: P6Mo18O73 heteropolyanion and its four-copper complex: theoretical and experimental investigation
Source: Royal Society of Chemistry journal article supplement (doi:10.1039/c000606h), 2010-01-01
Supplement: c000606h.pdf [file c000606h.pdf]

## **P<sub>6</sub>Mo<sub>18</sub>O<sub>73</sub> Heteropolyanion and Its Four-Copper Complex: Theoretical and Experimental Investigation**

Fu-Qiang Zhang, Xian-Ming Zhang, Rui-Qin Fang, Hai-Shun Wu

School of Chemistry & Material Science, Shanxi Normal University, Linfen, P. R.

China.

**Table S1.** Bond lengths (Å) and angles (°) for **1**.

|                   |            |                   |            |
|-------------------|------------|-------------------|------------|
| Cu(1)-O(36)       | 1.899(4)   | Cu(2)-O(34)       | 1.906(3)   |
| Cu(1)-N(2)        | 1.969(5)   | Cu(2)-N(4)        | 1.977(5)   |
| Cu(1)-N(1)        | 2.015(5)   | Cu(2)-N(3)        | 1.994(5)   |
| Cu(1)-O(14)       | 2.039(4)   | Cu(2)-O(1W)       | 2.007(4)   |
| Cu(1)-O(2W)       | 2.226(4)   |                   |            |
| O(36)-Cu(1)-N(2)  | 172.83(18) | N(1)-Cu(1)-O(2W)  | 111.31(19) |
| O(36)-Cu(1)-N(1)  | 91.86(18)  | O(14)-Cu(1)-O(2W) | 96.87(17)  |
| N(2)-Cu(1)-N(1)   | 81.67(19)  | O(34)-Cu(2)-N(4)  | 176.99(19) |
| O(36)-Cu(1)-O(14) | 93.43(15)  | O(34)-Cu(2)-N(3)  | 96.55(17)  |
| N(2)-Cu(1)-O(14)  | 93.74(17)  | N(4)-Cu(2)-N(3)   | 81.6(2)    |
| N(1)-Cu(1)-O(14)  | 151.31(17) | O(34)-Cu(2)-O(1W) | 87.33(17)  |
| O(36)-Cu(1)-O(2W) | 90.00(16)  | N(4)-Cu(2)-O(1W)  | 95.0(2)    |
| N(2)-Cu(1)-O(2W)  | 89.47(18)  | N(3)-Cu(2)-O(1W)  | 165.6(2)   |

**Table S2** Comparison of calculated and experimental bond lengths (Å) of [KP<sub>6</sub>Mo<sub>18</sub>O<sub>73</sub>]<sup>10-</sup> anion.

| Distances           | Calc. | Expt  | Distances | Calc. | Expt. |
|---------------------|-------|-------|-----------|-------|-------|
| Mo1-O <sub>t</sub>  | 1.743 | 1.689 | Mo4-O31   | 1.969 | 2.001 |
| Mo3-O <sub>t</sub>  | 1.767 | 1.694 | Mo8-O15   | 2.167 | 2.119 |
| Mo4-O <sub>t</sub>  | 1.748 | 1.697 | Mo8-O16   | 1.908 | 1.884 |
| Mo8-O <sub>t</sub>  | 1.748 | 1.702 | Mo8-O19   | 2.281 | 2.258 |
| Mo24-O <sub>t</sub> | 1.756 | 1.714 | Mo8-O20   | 1.959 | 1.934 |
| Mo25-O <sub>t</sub> | 1.747 | 1.714 | Mo24-O12  | 2.157 | 2.055 |
| P26-O <sub>t</sub>  | 1.505 | 1.511 | Mo24-O27  | 1.825 | 1.827 |
| Mo1-O12             | 2.100 | 2.048 | Mo24-O30  | 2.437 | 2.305 |
| Mo2-O13             | 1.862 | 1.804 | Mo25-O27  | 2.197 | 1.979 |
| Mo2-O14             | 1.814 | 1.771 | Mo25-O28  | 1.953 | 1.891 |
| Mo3-O13             | 2.103 | 2.076 | P26-O30   | 1.639 | 1.578 |
| Mo3-O15             | 1.826 | 1.786 | P26-O31   | 1.622 | 1.538 |
| Mo3-O22             | 2.399 | 2.379 | P26-O32   | 1.546 | 1.526 |
| Mo4-O14             | 2.111 | 2.034 |           |       |       |
| Mo4-O16             | 1.949 | 1.885 |           |       |       |
| Mo4-O17             | 1.908 | 1.854 |           |       |       |
| Mo4-O21             | 2.160 | 2.215 |           |       |       |

**Table S3** Electronic parameters (eV) of  $[\text{P}_2\text{Mo}_{18}\text{O}_{62}]^{6-}$ ,  $[\text{KP}_6\text{Mo}_{18}\text{O}_{73}]^{7-}$  and  $[\text{KP}_6\text{Mo}_{18}\text{O}_{73}]^{10-}$  anions.

|                  | $[\text{P}_2\text{Mo}_{18}\text{O}_{62}]^{6-}$ | $[\text{P}_6\text{Mo}_{18}\text{O}_{73}]^{7-}$ | $[\text{KP}_6\text{Mo}_{18}\text{O}_{73}]^{10-}$ |
|------------------|------------------------------------------------|------------------------------------------------|--------------------------------------------------|
| $E(\text{LUMO})$ | -4.566                                         | -5.980                                         | -4.282xxx                                        |
| $E(\text{HOMO})$ | -5.973                                         | -5.511                                         | -3.759xxx                                        |
| $q/m$            | 0.33                                           | 0.39                                           | 0.56                                             |

**Table S4** Bind energies of  $[\text{KH}_2\text{P}_6\text{Mo}_{18}\text{O}_{73}]^{8-}$ .

|    | sites <sup>[a]</sup>         | VWN/TZP    | PW91PW91/TZP |
|----|------------------------------|------------|--------------|
| 1  | 27/27                        | -32.89028  |              |
| 2  | 12/12                        | -32.87245  |              |
| 3  | 17/17                        | -32.86457  |              |
| 4  | 20/20                        | -32.89932  |              |
| 6  | 18/18                        | -32.89266  |              |
| 7  | 15/15                        | -32.90566  |              |
| 8  | 14/14                        | -32.86691  |              |
| 9  | 31/31                        | -32.88453  |              |
| 10 | 32/32                        | -32.91182  | -30.255xx    |
| 11 | 30/30                        | -32.86672  |              |
| 21 | 36/36                        | -32.86797  |              |
| 26 | 29/29...33/33 <sup>[b]</sup> | -32.96464  | -30.274036   |
| 22 | 29/29...34/34 <sup>[c]</sup> | -32.95712  | -30.28003    |
| 23 | 35/35                        | -32.87660  |              |
| 24 | 33/33                        | -32.91176  | -30.247916   |
| 25 | 34/34                        | -32.900473 |              |

a) Labels are shown in Figure 1 of the paper. b) The hydrogen atom binds to O(29) and form hydrogen bond with O(33). c) The hydrogen atom binds to O(29) and form hydrogen bond with O(34).

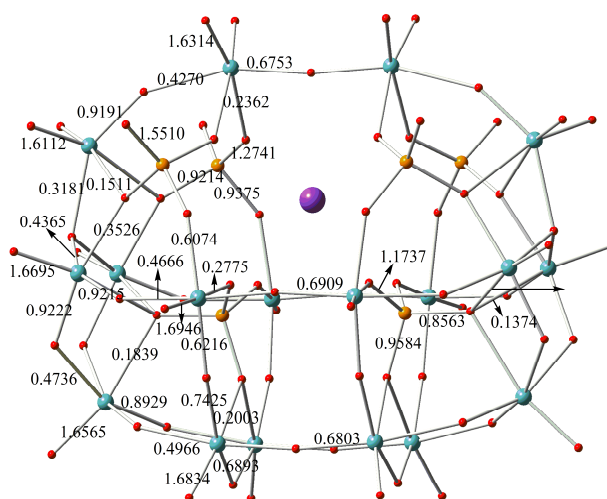

**Figure S1.** Mayer bond order of  $[\text{KP}_6\text{Mo}_{18}\text{O}_{73}]^{10-}$  anion.

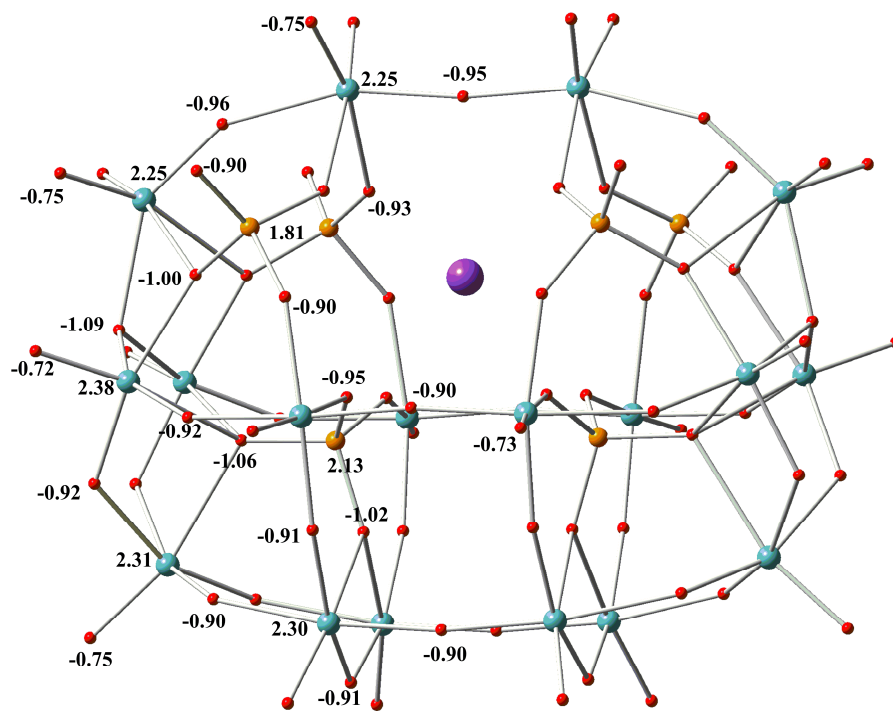

Figure S2. Mulliken charges of  $[\text{KP}_6\text{Mo}_{18}\text{O}_{73}]^{10-}$  anion.

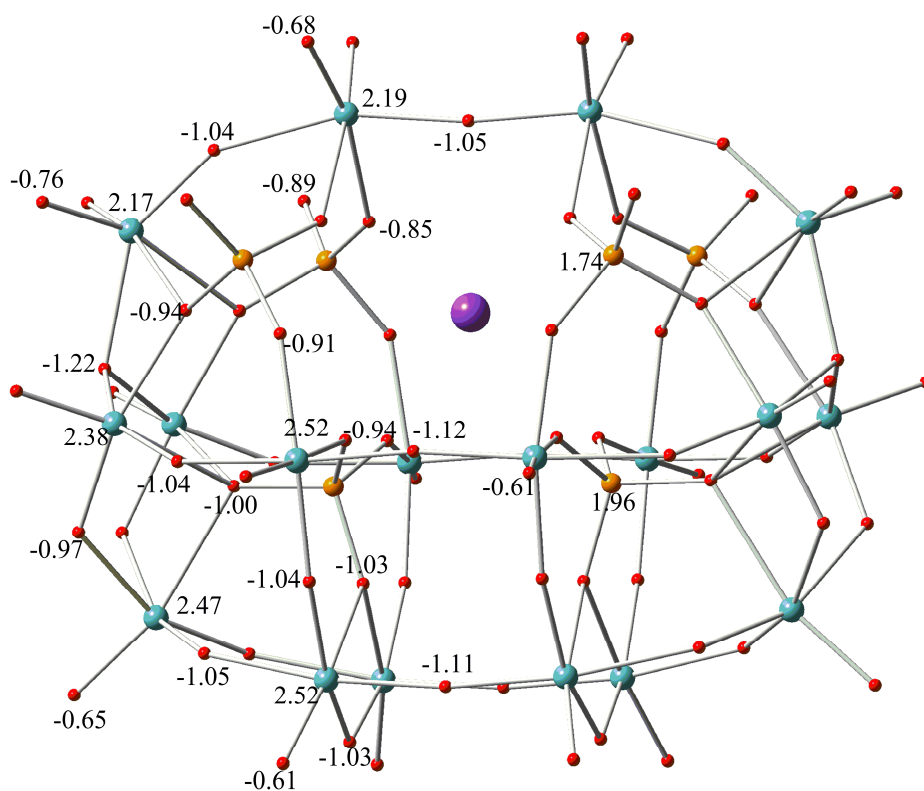

Figure S3. Multipolar charges of  $[\text{KP}_6\text{Mo}_{18}\text{O}_{73}]^{10-}$  anion.

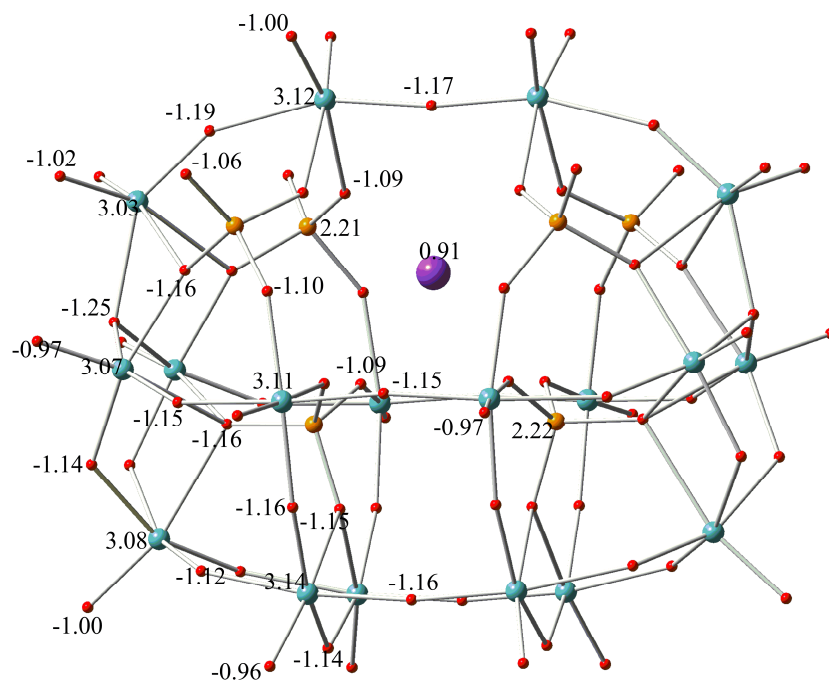

**Figure S4.** Voronoi charges of  $[\text{KP}_6\text{Mo}_{18}\text{O}_{73}]^{10-}$  anion.

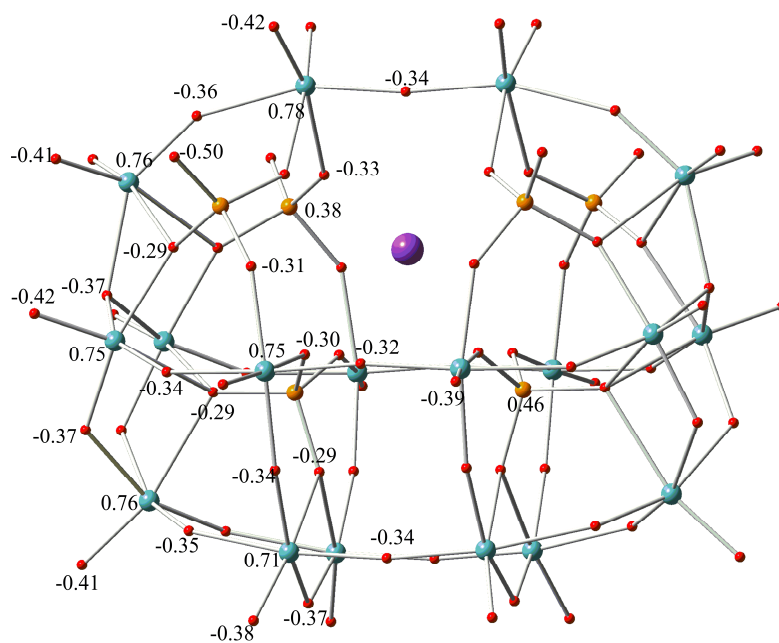

**Figure S5.** Hirshfeld charges of  $[\text{KP}_6\text{Mo}_{18}\text{O}_{73}]^{10-}$  anion.

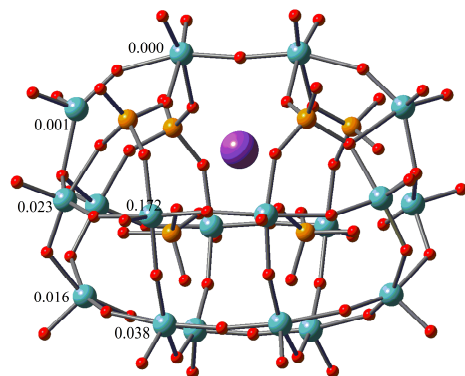

**Figure S6.** Spin densities of  $[\text{KP}_6\text{Mo}_{18}\text{O}_{73}]^{10-}$  anion.

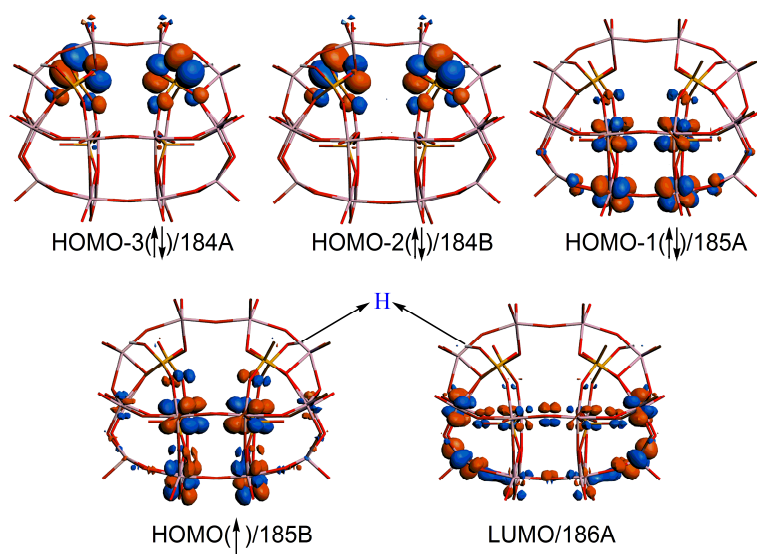

**Figure S7.** Schematic view of the frontier orbitals of protonated  $\text{H}_2\text{KP}_6\text{Mo}_{18}\text{O}_{73}^{8-}$  anion under  $C_2$  symmetry

**Coordinates of  $KP_6Mo_{18}$  (7  $\square$ ) at PW91PW91/TZP level:**

|       |           |           |           |
|-------|-----------|-----------|-----------|
| 1 P   | 2.160298  | 0.000000  | 0.958039  |
| 2 P   | 2.872127  | 2.448790  | -2.487069 |
| 3 P   | 2.872127  | -2.448790 | -2.487069 |
| 4 Mo  | 5.162962  | -1.771551 | 0.008264  |
| 5 Mo  | 5.162962  | 1.771551  | 0.008264  |
| 6 Mo  | 1.915893  | 0.000000  | -4.759539 |
| 7 Mo  | 5.286845  | 0.000000  | -2.944040 |
| 8 Mo  | 5.037688  | 0.000000  | 2.969266  |
| 9 Mo  | 1.913153  | 1.700684  | 3.970683  |
| 10 Mo | -1.913153 | 1.700684  | 3.970683  |
| 11 Mo | 1.897042  | 3.396624  | 0.585911  |
| 12 Mo | -1.897042 | 3.396624  | 0.585911  |
| 13 Mo | -5.162962 | 1.771551  | 0.008264  |
| 14 Mo | -5.162962 | -1.771551 | 0.008264  |
| 15 Mo | -1.915893 | 0.000000  | -4.759539 |
| 16 Mo | -5.286845 | 0.000000  | -2.944040 |
| 17 Mo | -5.037688 | 0.000000  | 2.969266  |
| 18 Mo | -1.913153 | -1.700684 | 3.970683  |
| 19 Mo | 1.913153  | -1.700684 | 3.970683  |
| 20 Mo | -1.897042 | -3.396624 | 0.585911  |
| 21 Mo | 1.897042  | -3.396624 | 0.585911  |
| 22 P  | -2.160298 | 0.000000  | 0.958039  |
| 23 P  | -2.872127 | -2.448790 | -2.487069 |
| 24 P  | -2.872127 | 2.448790  | -2.487069 |
| 25 K  | 0.000000  | 0.000000  | -1.620371 |
| 26 O  | 5.781109  | 0.000000  | -0.862775 |
| 27 O  | 3.962529  | -1.545520 | -1.688624 |
| 28 O  | 3.757568  | 0.000000  | 0.948322  |
| 29 O  | 3.878526  | -2.930286 | 0.624521  |
| 30 O  | 6.363456  | -2.829961 | -0.614969 |
| 31 O  | 5.903434  | -1.307099 | 1.649789  |
| 32 O  | 6.363456  | 2.829961  | -0.614969 |
| 33 O  | 5.903434  | 1.307099  | 1.649789  |
| 34 O  | 3.878526  | 2.930286  | 0.624521  |
| 35 O  | 3.962529  | 1.545520  | -1.688624 |
| 36 O  | 1.800912  | -1.489376 | -3.022349 |
| 37 O  | 1.800912  | 1.489376  | -3.022349 |
| 38 O  | 2.106209  | 1.346040  | -5.846639 |
| 39 O  | 2.106209  | -1.346040 | -5.846639 |
| 40 O  | -5.781109 | 0.000000  | -0.862775 |
| 41 O  | -3.962529 | 1.545520  | -1.688624 |
| 42 O  | -3.757568 | 0.000000  | 0.948322  |
| 43 O  | -3.878526 | 2.930286  | 0.624521  |

|      |           |           |           |
|------|-----------|-----------|-----------|
| 44 O | -6.363456 | 2.829961  | -0.614969 |
| 45 O | -5.903434 | 1.307099  | 1.649789  |
| 46 O | -6.363456 | -2.829961 | -0.614969 |
| 47 O | -5.903434 | -1.307099 | 1.649789  |
| 48 O | -3.878526 | -2.930286 | 0.624521  |
| 49 O | -3.962529 | -1.545520 | -1.688624 |
| 50 O | -1.800912 | 1.489376  | -3.022349 |
| 51 O | -1.800912 | -1.489376 | -3.022349 |
| 52 O | -2.106209 | -1.346040 | -5.846639 |
| 53 O | -2.106209 | 1.346040  | -5.846639 |
| 54 O | 0.000000  | 0.000000  | -4.552057 |
| 55 O | 6.275203  | 1.354647  | -3.401283 |
| 56 O | 3.892310  | 0.000000  | -4.151438 |
| 57 O | 6.275203  | -1.354647 | -3.401283 |
| 58 O | 6.294765  | 0.000000  | 4.148392  |
| 59 O | 3.882815  | -1.334140 | 3.564087  |
| 60 O | 3.882815  | 1.334140  | 3.564087  |
| 61 O | 2.277661  | 2.781821  | 5.261890  |
| 62 O | 2.014875  | 0.000000  | 4.924225  |
| 63 O | 1.690947  | 0.000000  | 2.459599  |
| 64 O | 1.882536  | 2.871855  | 2.464814  |
| 65 O | 0.000000  | 1.698919  | 4.095289  |
| 66 O | -2.277661 | 2.781821  | 5.261890  |
| 67 O | -1.882536 | 2.871855  | 2.464814  |
| 68 O | 2.143193  | 3.349129  | -1.332454 |
| 69 O | 2.208867  | 5.076681  | 0.852995  |
| 70 O | 0.000000  | 3.500087  | 0.479293  |
| 71 O | 1.634322  | 1.258003  | 0.250141  |
| 72 O | 1.634322  | -1.258003 | 0.250141  |
| 73 O | 2.143193  | -3.349129 | -1.332454 |
| 74 O | -2.208867 | 5.076681  | 0.852995  |
| 75 O | 3.529366  | 3.415264  | -3.428918 |
| 76 O | 3.529366  | -3.415264 | -3.428918 |
| 77 O | -6.275203 | -1.354647 | -3.401283 |
| 78 O | -3.892310 | 0.000000  | -4.151438 |
| 79 O | -6.275203 | 1.354647  | -3.401283 |
| 80 O | -6.294765 | 0.000000  | 4.148392  |
| 81 O | -3.882815 | 1.334140  | 3.564087  |
| 82 O | -3.882815 | -1.334140 | 3.564087  |
| 83 O | -2.277661 | -2.781821 | 5.261890  |
| 84 O | -2.014875 | 0.000000  | 4.924225  |
| 85 O | -1.690947 | 0.000000  | 2.459599  |
| 86 O | -1.882536 | -2.871855 | 2.464814  |
| 87 O | 0.000000  | -1.698919 | 4.095289  |



|      |           |           |           |
|------|-----------|-----------|-----------|
| 88 O | 2.277661  | -2.781821 | 5.261890  |
| 89 O | 1.882536  | -2.871855 | 2.464814  |
| 90 O | -2.143193 | -3.349129 | -1.332454 |
| 91 O | -2.208867 | -5.076681 | 0.852995  |
| 92 O | 0.000000  | -3.500087 | 0.479293  |
| 93 O | -1.634322 | -1.258003 | 0.250141  |
| 94 O | -1.634322 | 1.258003  | 0.250141  |
| 95 O | -2.143193 | 3.349129  | -1.332454 |
| 96 O | 2.208867  | -5.076681 | 0.852995  |
| 97 O | -3.529366 | -3.415264 | -3.428918 |
| 98 O | -3.529366 | 3.415264  | -3.428918 |

**Coordinates of  $\text{KP}_6\text{Mo}_{18}\text{-3e}$  (10 □ ) at PW91PW91/TZP level:**

|       |           |           |           |
|-------|-----------|-----------|-----------|
| 1 P   | 2.182712  | 0.000000  | 0.980618  |
| 2 P   | 2.867994  | 2.438748  | -2.477754 |
| 3 P   | 2.867994  | -2.438748 | -2.477754 |
| 4 Mo  | 5.183906  | -1.782196 | -0.001746 |
| 5 Mo  | 5.183906  | 1.782196  | -0.001746 |
| 6 Mo  | 1.922045  | 0.000000  | -4.738837 |
| 7 Mo  | 5.300501  | 0.000000  | -2.944635 |
| 8 Mo  | 5.032546  | 0.000000  | 2.975787  |
| 9 Mo  | 1.900023  | 1.700785  | 4.001776  |
| 10 Mo | -1.900023 | 1.700785  | 4.001776  |
| 11 Mo | 1.888238  | 3.382492  | 0.622283  |
| 12 Mo | -1.888238 | 3.382492  | 0.622283  |
| 13 Mo | -5.183906 | 1.782196  | -0.001746 |
| 14 Mo | -5.183906 | -1.782196 | -0.001746 |
| 15 Mo | -1.922045 | 0.000000  | -4.738837 |
| 16 Mo | -5.300501 | 0.000000  | -2.944635 |
| 17 Mo | -5.032546 | 0.000000  | 2.975787  |
| 18 Mo | -1.900023 | -1.700785 | 4.001776  |
| 19 Mo | 1.900023  | -1.700785 | 4.001776  |
| 20 Mo | -1.888238 | -3.382492 | 0.622283  |
| 21 Mo | 1.888238  | -3.382492 | 0.622283  |
| 22 P  | -2.182712 | 0.000000  | 0.980618  |
| 23 P  | -2.867994 | -2.438748 | -2.477754 |
| 24 P  | -2.867994 | 2.438748  | -2.477754 |
| 25.K  | 0.000000  | 0.000000  | -1.602250 |
| 26 O  | 5.807096  | 0.000000  | -0.884169 |
| 27 O  | 3.989799  | -1.533430 | -1.715104 |
| 28 O  | 3.780621  | 0.000000  | 0.958122  |
| 29 O  | 3.903115  | -2.922077 | 0.607973  |
| 30 O  | 6.393602  | -2.850916 | -0.622897 |
| 31 O  | 5.940568  | -1.309358 | 1.623321  |
| 32 O  | 6.393602  | 2.850916  | -0.622897 |
| 33 O  | 5.940568  | 1.309358  | 1.623321  |
| 34 O  | 3.903115  | 2.922077  | 0.607973  |
| 35 O  | 3.989799  | 1.533430  | -1.715104 |
| 36 O  | 1.827943  | -1.443443 | -3.038396 |
| 37 O  | 1.827943  | 1.443443  | -3.038396 |
| 38 O  | 2.136595  | 1.348091  | -5.834568 |
| 39 O  | 2.136595  | -1.348091 | -5.834568 |
| 40 O  | -5.807096 | 0.000000  | -0.884169 |
| 41 O  | -3.989799 | 1.533430  | -1.715104 |
| 42 O  | -3.780621 | 0.000000  | 0.958122  |

|      |           |           |           |
|------|-----------|-----------|-----------|
| 43 O | -3.903115 | 2.922077  | 0.607973  |
| 44 O | -6.393602 | 2.850916  | -0.622897 |
| 45 O | -5.940568 | 1.309358  | 1.623321  |
| 46 O | -6.393602 | -2.850916 | -0.622897 |
| 47 O | -5.940568 | -1.309358 | 1.623321  |
| 48 O | -3.903115 | -2.922077 | 0.607973  |
| 49 O | -3.989799 | -1.533430 | -1.715104 |
| 50 O | -1.827943 | 1.443443  | -3.038396 |
| 51 O | -1.827943 | -1.443443 | -3.038396 |
| 52 O | -2.136595 | -1.348091 | -5.834568 |
| 53 O | -2.136595 | 1.348091  | -5.834568 |
| 54 O | 0.000000  | 0.000000  | -4.595321 |
| 55 O | 6.302267  | 1.354702  | -3.406647 |
| 56 O | 3.932732  | 0.000000  | -4.177298 |
| 57 O | 6.302267  | -1.354702 | -3.406647 |
| 58 O | 6.342796  | 0.000000  | 4.122735  |
| 59 O | 3.936854  | -1.354297 | 3.552051  |
| 60 O | 3.936854  | 1.354297  | 3.552051  |
| 61 O | 2.316806  | 2.802761  | 5.272243  |
| 62 O | 2.012064  | 0.000000  | 4.953852  |
| 63 O | 1.722896  | 0.000000  | 2.487270  |
| 64 O | 1.838822  | 2.865686  | 2.471854  |
| 65 O | 0.000000  | 1.738986  | 4.151848  |
| 66 O | -2.316806 | 2.802761  | 5.272243  |
| 67 O | -1.838822 | 2.865686  | 2.471854  |
| 68 O | 2.125206  | 3.322704  | -1.363958 |
| 69 O | 2.257395  | 5.068007  | 0.855592  |
| 70 O | 0.000000  | 3.532765  | 0.491512  |
| 71 O | 1.651273  | 1.254813  | 0.271126  |
| 72 O | 1.651273  | -1.254813 | 0.271126  |
| 73 O | 2.125206  | -3.322704 | -1.363958 |
| 74 O | -2.257395 | 5.068007  | 0.855592  |
| 75 O | 3.516077  | 3.388933  | -3.456156 |
| 76 O | 3.516077  | -3.388933 | -3.456156 |
| 77 O | -6.302267 | -1.354702 | -3.406647 |
| 78 O | -3.932732 | 0.000000  | -4.177298 |
| 79 O | -6.302267 | 1.354702  | -3.406647 |
| 80 O | -6.342796 | 0.000000  | 4.122735  |
| 81 O | -3.936854 | 1.354297  | 3.552051  |
| 82 O | -3.936854 | -1.354297 | 3.552051  |
| 83 O | -2.316806 | -2.802761 | 5.272243  |
| 84 O | -2.012064 | 0.000000  | 4.953852  |
| 85 O | -1.722896 | 0.000000  | 2.487270  |
| 86 O | -1.838822 | -2.865686 | 2.471854  |

|      |           |           |           |
|------|-----------|-----------|-----------|
| 87 O | 0.000000  | -1.738986 | 4.151848  |
| 88 O | 2.316806  | -2.802761 | 5.272243  |
| 89 O | 1.838822  | -2.865686 | 2.471854  |
| 90 O | -2.125206 | -3.322704 | -1.363958 |
| 91 O | -2.257395 | -5.068007 | 0.855592  |
| 92 O | 0.000000  | -3.532765 | 0.491512  |
| 93 O | -1.651273 | -1.254813 | 0.271126  |
| 94 O | -1.651273 | 1.254813  | 0.271126  |
| 95 O | -2.125206 | 3.322704  | -1.363958 |
| 96 O | 2.257395  | -5.068007 | 0.855592  |
| 97 O | -3.516077 | -3.388933 | -3.456156 |
| 98 O | -3.516077 | 3.388933  | -3.456156 |

**Coordinates of  $\text{KH}_2\text{P}_6\text{Mo}_{18}\text{-3e}$  (8 □ ) at PW91PW91/TZP level:**

|    |    |           |           |           |
|----|----|-----------|-----------|-----------|
| 1  | P  | -2.186328 | -0.025131 | -1.042642 |
| 2  | P  | -2.882533 | 2.432744  | 2.428570  |
| 3  | P  | -2.810295 | -2.369036 | 2.292996  |
| 4  | Mo | -5.164741 | -1.777423 | -0.118424 |
| 5  | Mo | -5.205152 | 1.760649  | -0.075981 |
| 6  | Mo | -1.912224 | 0.106025  | 4.719491  |
| 7  | Mo | -5.250156 | -0.014079 | 2.869916  |
| 8  | Mo | -5.031061 | -0.006884 | -3.071013 |
| 9  | Mo | -1.897724 | 1.697846  | -4.067343 |
| 10 | Mo | 1.902667  | 1.703710  | -4.088892 |
| 11 | Mo | -1.902095 | 3.366624  | -0.680631 |
| 12 | Mo | 1.878809  | 3.403884  | -0.736118 |
| 13 | Mo | 5.164741  | 1.777423  | -0.118424 |
| 14 | Mo | 5.205152  | -1.760649 | -0.075981 |
| 15 | Mo | 1.912224  | -0.106025 | 4.719491  |
| 16 | Mo | 5.250156  | 0.014079  | 2.869916  |
| 17 | Mo | 5.031061  | 0.006884  | -3.071013 |
| 18 | Mo | 1.897724  | -1.697846 | -4.067343 |
| 19 | Mo | -1.902667 | -1.703710 | -4.088892 |
| 20 | Mo | 1.902095  | -3.366624 | -0.680631 |
| 21 | Mo | -1.878809 | -3.403884 | -0.736118 |
| 22 | P  | 2.186328  | 0.025131  | -1.042642 |
| 23 | P  | 2.882533  | -2.432744 | 2.428570  |
| 24 | P  | 2.810295  | 2.369036  | 2.292996  |
| 25 | K  | 0.000000  | 0.000000  | 1.533570  |
| 26 | O  | -5.798147 | -0.025839 | 0.820804  |
| 27 | O  | -3.855432 | -1.432205 | 1.553536  |
| 28 | O  | -3.786956 | -0.027756 | -1.032181 |
| 29 | O  | -3.879810 | -2.930845 | -0.707714 |
| 30 | O  | -6.325488 | -2.841992 | 0.587292  |
| 31 | O  | -5.951729 | -1.343482 | -1.720550 |
| 32 | O  | -6.415653 | 2.817699  | 0.552462  |
| 33 | O  | -5.947834 | 1.278997  | -1.699598 |
| 34 | O  | -3.916465 | 2.896094  | -0.670827 |
| 35 | O  | -4.029626 | 1.532904  | 1.681894  |
| 36 | O  | -1.772579 | -1.545478 | 3.033014  |
| 37 | O  | -1.829766 | 1.425081  | 2.967920  |
| 38 | O  | -2.050725 | 1.452003  | 5.810683  |
| 39 | O  | -2.212636 | -1.240022 | 5.793582  |
| 40 | O  | 5.798147  | 0.025839  | 0.820804  |
| 41 | O  | 3.855432  | 1.432205  | 1.553536  |
| 42 | O  | 3.786956  | 0.027756  | -1.032181 |
| 43 | O  | 3.879810  | 2.930845  | -0.707714 |

|    |   |           |           |           |
|----|---|-----------|-----------|-----------|
| 44 | O | 6.325488  | 2.841992  | 0.587292  |
| 45 | O | 5.951729  | 1.343482  | -1.720550 |
| 46 | O | 6.415653  | -2.817699 | 0.552462  |
| 47 | O | 5.947834  | -1.278997 | -1.699598 |
| 48 | O | 3.916465  | -2.896094 | -0.670827 |
| 49 | O | 4.029626  | -1.532904 | 1.681894  |
| 50 | O | 1.772579  | 1.545478  | 3.033014  |
| 51 | O | 1.829766  | -1.425081 | 2.967920  |
| 52 | O | 2.050725  | -1.452003 | 5.810683  |
| 53 | O | 2.212636  | 1.240022  | 5.793582  |
| 54 | O | 0.000000  | 0.000000  | 4.546883  |
| 55 | O | -6.435327 | 1.142279  | 3.392726  |
| 56 | O | -3.889798 | 0.115899  | 4.098096  |
| 57 | O | -5.955802 | -1.569393 | 3.326519  |
| 58 | O | -6.331136 | -0.010763 | -4.220249 |
| 59 | O | -3.930064 | -1.361655 | -3.639084 |
| 60 | O | -3.935423 | 1.346096  | -3.633477 |
| 61 | O | -2.302511 | 2.809016  | -5.326117 |
| 62 | O | -2.009953 | -0.000871 | -5.022035 |
| 63 | O | -1.721313 | -0.020859 | -2.543261 |
| 64 | O | -1.852537 | 2.852767  | -2.525625 |
| 65 | O | -0.000471 | 1.726812  | -4.206082 |
| 66 | O | 2.295501  | 2.802971  | -5.361135 |
| 67 | O | 1.836078  | 2.906734  | -2.563004 |
| 68 | O | -2.148306 | 3.302841  | 1.309769  |
| 69 | O | -2.269917 | 5.048698  | -0.893256 |
| 70 | O | -0.008188 | 3.513639  | -0.566556 |
| 71 | O | -1.669048 | 1.225645  | -0.318093 |
| 72 | O | -1.650708 | -1.284116 | -0.331106 |
| 73 | O | -2.157672 | -3.413620 | 1.341001  |
| 74 | O | 2.226093  | 5.094045  | -0.898816 |
| 75 | O | -3.515289 | 3.365061  | 3.428238  |
| 76 | O | -3.724539 | -3.255558 | 3.295449  |
| 77 | O | 6.435327  | -1.142279 | 3.392726  |
| 78 | O | 3.889798  | -0.115899 | 4.098096  |
| 79 | O | 5.955802  | 1.569393  | 3.326519  |
| 80 | O | 6.331136  | 0.010763  | -4.220249 |
| 81 | O | 3.930064  | 1.361655  | -3.639084 |
| 82 | O | 3.935423  | -1.346096 | -3.633477 |
| 83 | O | 2.302511  | -2.809016 | -5.326117 |
| 84 | O | 2.009953  | 0.000871  | -5.022035 |
| 85 | O | 1.721313  | 0.020859  | -2.543261 |
| 86 | O | 1.852537  | -2.852767 | -2.525625 |
| 87 | O | 0.000471  | -1.726812 | -4.206082 |

|     |   |           |           |           |
|-----|---|-----------|-----------|-----------|
| 88  | O | -2.295501 | -2.802971 | -5.361135 |
| 89  | O | -1.836078 | -2.906734 | -2.563004 |
| 90  | O | 2.148306  | -3.302841 | 1.309769  |
| 91  | O | 2.269917  | -5.048698 | -0.893256 |
| 92  | O | 0.008188  | -3.513639 | -0.566556 |
| 93  | O | 1.669048  | -1.225645 | -0.318093 |
| 94  | O | 1.650708  | 1.284116  | -0.331106 |
| 95  | O | 2.157672  | 3.413620  | 1.341001  |
| 96  | O | -2.226093 | -5.094045 | -0.898816 |
| 97  | O | 3.515289  | -3.365061 | 3.428238  |
| 98  | O | 3.724539  | 3.255558  | 3.295449  |
| 99  | H | 4.593876  | 2.770355  | 3.415623  |
| 100 | H | -4.593876 | -2.770355 | 3.415623  |

**Coordinates of P<sub>2</sub>Mo<sub>18</sub> at PW91PW91/TZP level:**

|    |    |           |           |           |
|----|----|-----------|-----------|-----------|
| 1  | P  | 0.000000  | 0.000000  | 2.036936  |
| 2  | P  | 0.000000  | 0.000000  | -2.036936 |
| 3  | O  | 0.000000  | 0.000000  | 3.641108  |
| 4  | O  | 0.741595  | 1.291832  | 1.577131  |
| 5  | O  | -1.489557 | -0.003676 | 1.577131  |
| 6  | O  | 0.747962  | -1.288156 | 1.577131  |
| 7  | O  | 0.000000  | 0.000000  | -3.641108 |
| 8  | O  | 0.747962  | 1.288156  | -1.577131 |
| 9  | O  | 0.741595  | -1.291832 | -1.577131 |
| 10 | O  | -1.489557 | 0.003676  | -1.577131 |
| 11 | Mo | -3.122469 | 1.711582  | -1.897638 |
| 12 | Mo | 3.030933  | -1.878659 | -1.902313 |
| 13 | Mo | 0.078962  | -3.559928 | -1.897638 |
| 14 | Mo | -3.142433 | -1.685535 | -1.902313 |
| 15 | Mo | 3.043508  | 1.848347  | -1.897638 |
| 16 | Mo | 0.111500  | 3.564194  | -1.902313 |
| 17 | Mo | -0.990061 | -1.715618 | -4.984084 |
| 18 | Mo | -0.990739 | 1.715227  | -4.984084 |
| 19 | Mo | 1.980799  | 0.000391  | -4.984084 |
| 20 | Mo | 3.043508  | -1.848347 | 1.897638  |
| 21 | Mo | -3.142433 | 1.685535  | 1.902313  |
| 22 | Mo | -3.122469 | -1.711582 | 1.897638  |
| 23 | Mo | 0.111500  | -3.564194 | 1.902313  |
| 24 | Mo | 0.078962  | 3.559928  | 1.897638  |
| 25 | Mo | 3.030933  | 1.878659  | 1.902313  |
| 26 | Mo | -0.990739 | -1.715227 | 4.984084  |
| 27 | Mo | 1.980799  | -0.000391 | 4.984084  |
| 28 | Mo | -0.990061 | 1.715618  | 4.984084  |
| 29 | O  | 0.777697  | -1.346864 | -5.729214 |
| 30 | O  | -0.194015 | -2.940461 | -3.733749 |
| 31 | O  | 2.017430  | 3.479217  | -2.184391 |
| 32 | O  | 2.004375  | -3.486754 | -2.184391 |
| 33 | O  | 0.777570  | 1.346938  | -5.729214 |
| 34 | O  | -2.447348 | -1.638390 | -3.732693 |
| 35 | O  | -4.021805 | 0.007537  | -2.184391 |
| 36 | O  | -1.555268 | -0.000073 | -5.729214 |
| 37 | O  | 3.384484  | -0.006361 | -1.569747 |
| 38 | O  | -1.697751 | -2.927868 | -1.569747 |
| 39 | O  | -3.373183 | 1.529808  | 0.002103  |
| 40 | O  | -2.449507 | 1.638252  | -3.733749 |
| 41 | O  | 2.643522  | 1.302209  | -3.733749 |
| 42 | O  | 3.011445  | 2.156358  | 0.002103  |
| 43 | O  | 2.642561  | -1.300270 | -3.732693 |



|      |           |           |           |
|------|-----------|-----------|-----------|
| 44 O | -0.195213 | 2.938660  | -3.732693 |
| 45 O | -3.373183 | -1.529808 | -0.002103 |
| 46 O | -1.686733 | 2.934229  | -1.569747 |
| 47 O | -4.443815 | 2.779724  | -2.217197 |
| 48 O | -1.608308 | 2.787815  | -6.193374 |
| 49 O | -1.610164 | -2.786743 | -6.193374 |
| 50 O | 3.218473  | -0.001072 | -6.193374 |
| 51 O | -0.158227 | 5.240859  | -2.225274 |
| 52 O | 4.629219  | 2.458594  | -2.217197 |
| 53 O | 4.617831  | -2.483401 | -2.225274 |
| 54 O | -0.185404 | -5.238319 | -2.217197 |
| 55 O | -4.459604 | -2.757458 | -2.225274 |
| 56 O | -1.555268 | 0.000073  | 5.729214  |
| 57 O | -2.449507 | -1.638252 | 3.733749  |
| 58 O | 2.004375  | 3.486754  | 2.184391  |
| 59 O | -4.021805 | -0.007537 | 2.184391  |
| 60 O | 0.777697  | 1.346864  | 5.729214  |
| 61 O | -0.195213 | -2.938660 | 3.732693  |
| 62 O | 2.017430  | -3.479217 | 2.184391  |
| 63 O | 0.777570  | -1.346938 | 5.729214  |
| 64 O | -1.697751 | 2.927868  | 1.569747  |
| 65 O | -1.686733 | -2.934229 | 1.569747  |
| 66 O | 3.011445  | -2.156358 | -0.002103 |
| 67 O | 2.643522  | -1.302209 | 3.733749  |
| 68 O | -0.194015 | 2.940461  | 3.733749  |
| 69 O | 0.361739  | 3.686167  | -0.002103 |
| 70 O | -2.447348 | 1.638390  | 3.732693  |
| 71 O | 2.642561  | 1.300270  | 3.732693  |
| 72 O | 0.361739  | -3.686167 | 0.002103  |
| 73 O | 3.384484  | 0.006361  | 1.569747  |
| 74 O | 4.629219  | -2.458594 | 2.217197  |
| 75 O | 3.218473  | 0.001072  | 6.193374  |
| 76 O | -1.608308 | -2.787815 | 6.193374  |
| 77 O | -1.610164 | 2.786743  | 6.193374  |
| 78 O | 4.617831  | 2.483401  | 2.225274  |
| 79 O | -0.185404 | 5.238319  | 2.217197  |
| 80 O | -4.459604 | 2.757458  | 2.225274  |
| 81 O | -4.443815 | -2.779724 | 2.217197  |
| 82 O | -0.158227 | -5.240859 | 2.225274  |
